# Supplementary material
Source: PubMed Central journal article supplement (PMC7435347)
Supplement: jama-324-651-s003.pdf [file jama-324-651-s003.pdf]

# Data Sharing Statement

Ali. Effect of a Collaborative Care Model on Depressive Symptoms and Glycated Hemoglobin, Blood Pressure, and Serum Cholesterol Among Patients With Depression and Diabetes in India. *JAMA*. Published August 18, 2020. 10.1001/jama.2020.11747

## Data

**Data available:** Yes

**Data types:** Deidentified participant data

**How to access data:** mkali@emory.edu

**When available:** beginning date: 07-15-2020

## Supporting Documents

**Document types:** None

## Additional Information

**Who can access the data:** Requesters should be employees of a recognized academic institution or health service organizations.

Requesters must have experience in medical research and must be able to demonstrate their ability to carry out the proposed use of the requested dataset through their peer-review publications in the area of interest.

**Types of analyses:** Data sharing will only be for the purposes of health and medical research and within the constraints of the consent under which the data were originally gathered.

**Mechanisms of data availability:** The Requester(s) will be required to enter into a Data Sharing Agreement with Emory University

- Data supplied may be transferred only to the Requester(s) named in the original Data Sharing Request and as specified in the relevant Data Sharing Agreement.
- Data may not be transferred to individuals outside the Requester's research group.
- Supplied data must only be used for the purpose described in the Data Sharing Request as stipulated in the Data Sharing Agreement (please see <http://www.osp.emory.edu/forms/index.html> for relevant documents)
- All data provided to the Requester(s) will be de - identified and identifying data will not be made available to Requesters. The Requester and individuals within their research group must not attempt to identify any individual from the data provided. Should the Requester or individuals within their research group believe that they have inadvertently identified any individual, they must not record such identifiable data, or share the identification with any other person or attempt to contact the individual. Such identification must be promptly reported to Emory University.
- Recipients must agree not to link the de - identified data provided with any other dataset.
- Promptly following the end of the permitted use or upon termination of the agreement, the Requestor must return all copies of the Data to Source or destroy them and certify to the destruction; or, if User represents and Source agrees that neither return nor destruction is feasible, to continue to extend the protections of the agreement.
